# Supplementary material for: Engineering magnetic-molecular sequential targeting nanoparticles for anti-cancer therapy
Source: Royal Society of Chemistry journal article supplement (doi:10.1039/c3tb20715c), 2013-01-01
Supplement: c3tb20715c.pdf [file c3tb20715c.pdf]

## Supporting Information for:

# Engineering magnetic-molecular sequential targeting nanoparticles for anti-cancer therapy

Qi Zhang,<sup>a</sup> Jundong Zhu,<sup>a</sup> Lichao Song,<sup>a,b</sup> Ju Zhang,<sup>c</sup> Deling Kong,<sup>c</sup> Yanjun Zhao\*<sup>a</sup> and Zheng Wang\*<sup>a</sup>

<sup>a</sup> Tianjin Key Laboratory for Modern Drug Delivery & High Efficiency, School of Pharmaceutical Science & Technology, Tianjin University, 92 Weijin Road, Tianjin 300072, China

<sup>b</sup> Department of Pharmacy, Breast Cancer Prevention Key Laboratory of Ministry of Education, Tianjin Medical University Cancer Institute and Hospital, Tianjin 300060, China

<sup>c</sup> Tianjin Key Laboratory of Biomaterial Research, Institute of Biomedical Engineering, Chinese Academy of Medical Science, Tianjin 300192, China

\* To whom correspondence should be addressed.

Dr. Yanjun Zhao; Dr. Zheng Wang

School of Pharmaceutical Science & Technology, Tianjin University

92 Weijin Road, Nankai District, Tianjin 300072, China

Tel: +86-22-2740 4018, Fax: +86-22-2740 4018

Email: zhaoyj@tju.edu.cn; wangzheng 2006@tju.edu.cn

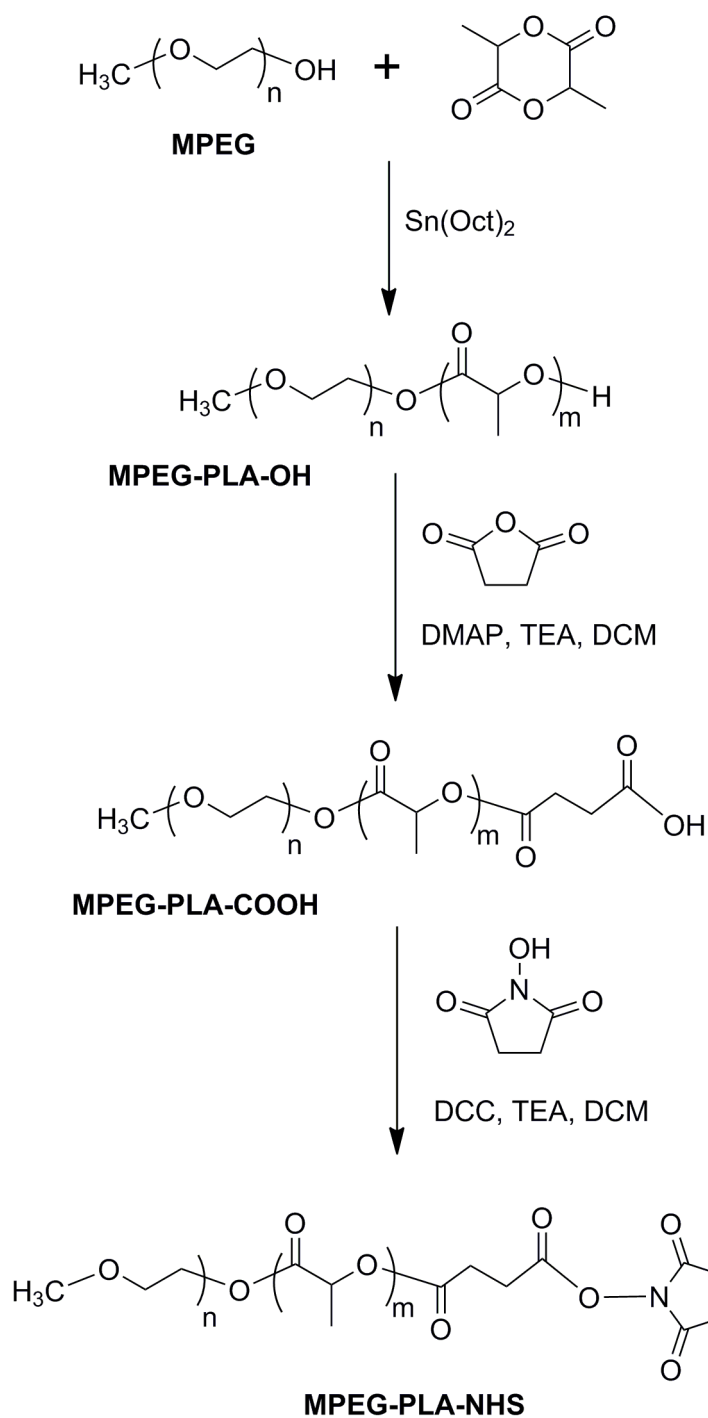

**Scheme S1. The synthesis and activation route of MPEG-PLA.**

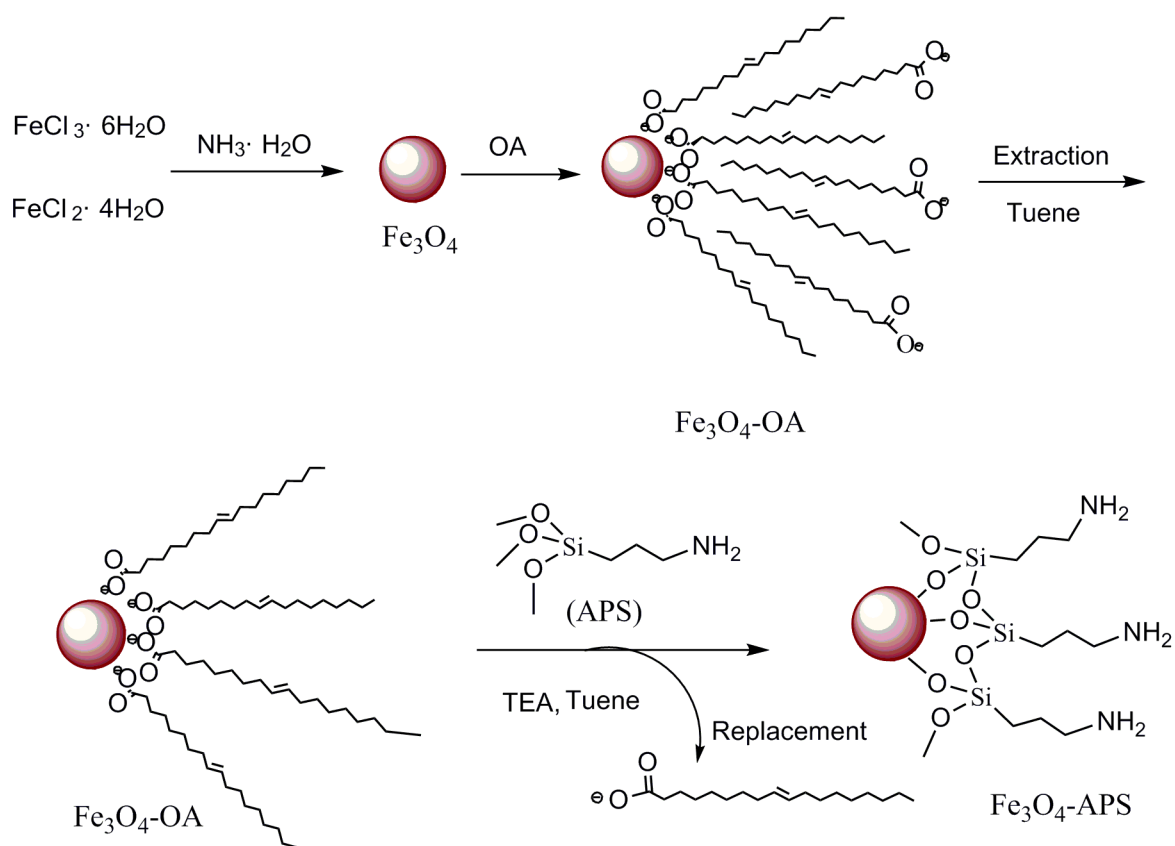

**Scheme S2. The synthetic route of Fe<sub>3</sub>O<sub>4</sub>-APS nanoparticles via co-precipitation followed by ligand exchange.**

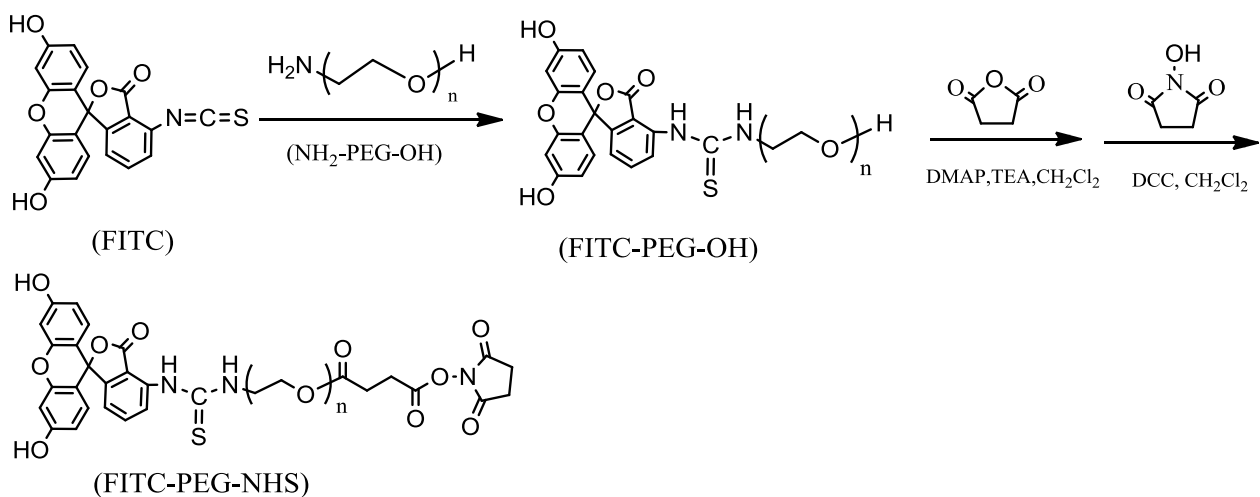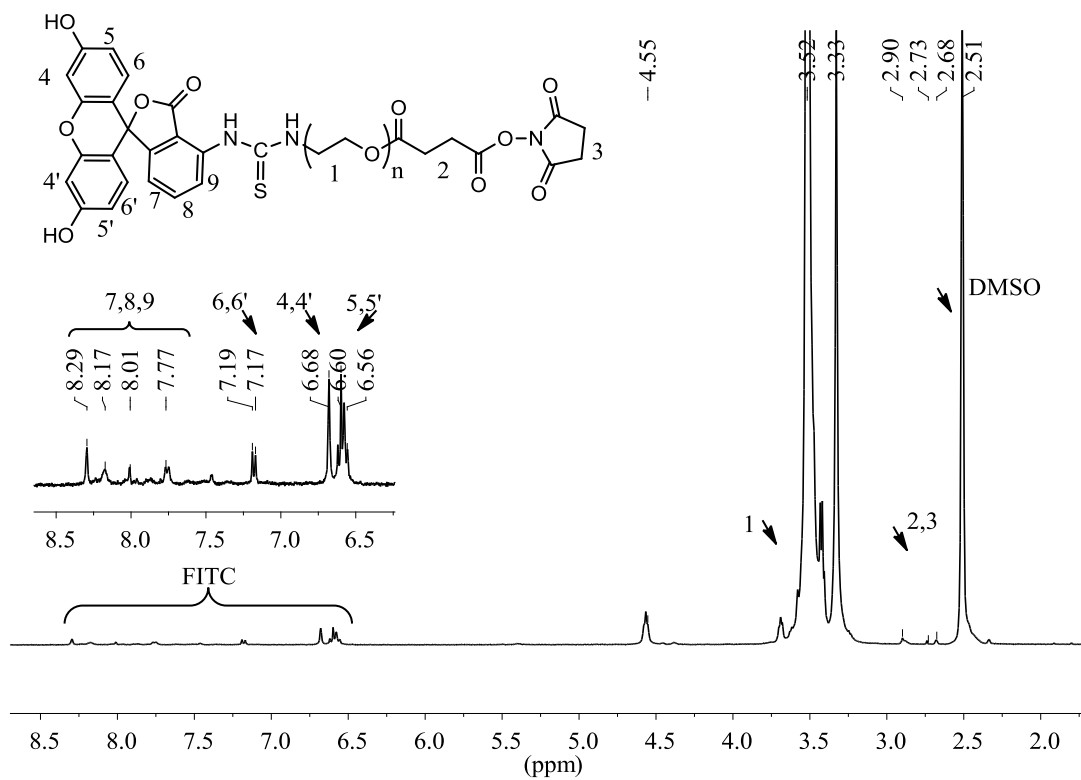

**Scheme S3.** The synthetic route of FITC-PEG-NHS (*top*) and its  $^1\text{H}$  NMR spectrum (*bottom*).

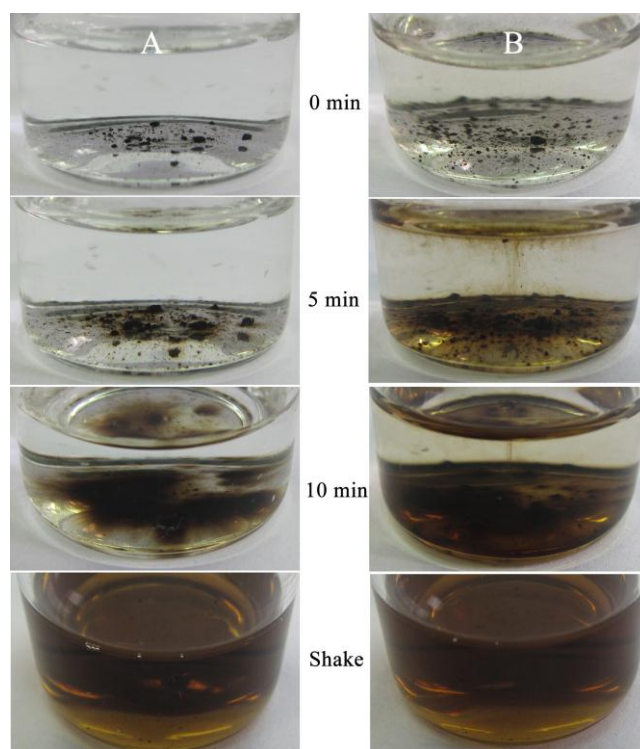

**Figure S1. The dispersibility of two types of SPIONs in water: (A): Fe<sub>3</sub>O<sub>4</sub>-Polym coated with MPEG-PLA, and (B) Fe<sub>3</sub>O<sub>4</sub>-Polym-FA<sub>20</sub> coated with PEG-PLA with 20% FA (folic acid).**
